# Supplementary material for: Potential Role of Hydroxyapatite Nanocrystalline for Early Diagnostics of Ovarian Cancer
Source: MDPI journal article supplement (doi:10.3390/diagnostics11101741), 2021-09-22
Supplement: s1 [file s1]

**Table S1. Control group. Ovarian tumors without calcifications**

| Case | Age of women | TNM |    |    | Tumor diameter (larger size), mm |
|------|--------------|-----|----|----|----------------------------------|
|      |              | T   | N  | M  |                                  |
| 1    | 60           | T3  | N1 | M0 | 21                               |
| 2    | 50           | T4  | N1 | M1 | 80                               |
| 3    | 33           | T1  | N1 | M0 | 20                               |
| 4    | 48           | T3  | N1 | M0 | 90                               |
| 5    | 39           | T3  | N1 | M0 | 70                               |
| 6    | 64           | T2  | N1 | M0 | 60                               |
| 7    | 77           | T2  | N1 | M0 | 60                               |
| 8    | 68           | T2  | N1 | M1 | 15                               |
| 9    | 48           | T2  | N0 | M0 | 20                               |
| 10   | 64           | T1  | N0 | M0 | 50                               |
| 11   | 33           | T1  | N0 | M0 | 20                               |
| 12   | 56           | T3  | N1 | M0 | 30                               |
| 13   | 55           | T2  | N0 | M0 | 25                               |
| 14   | 66           | T1  | Nx | M0 | 100                              |
| 15   | 49           | T1  | Nx | M0 | 20                               |
| 16   | 44           | T2  | N1 | M0 | 45                               |
| 17   | 51           | T3  | N1 | M0 | 5                                |
| 18   | 39           | T3  | N1 | M0 | 10                               |
| 19   | 57           | T3  | N1 | M0 | 35                               |
| 20   | 36           | T2  | N0 | M0 | 10                               |
| 21   | 46           | T3  | N1 | M0 | 20                               |
| 22   | 49           | T3  | N1 | M0 | 6                                |
| 23   | 52           | T1  | Nx | M0 | 60                               |
| 24   | 45           | T1  | N0 | M0 | 10                               |
| 25   | 59           | T3  | N1 | M1 | 10                               |
| 26   | 73           | T1  | N0 | M0 | 40                               |
| 27   | 54           | T3  | N1 | M0 | 15                               |
| 28   | 62           | T1  | Nx | M0 | 80                               |
| 29   | 45           | T3  | N1 | M0 | 120                              |
| 30   | 63           | T2  | N0 | M0 | 45                               |

Notes. T – tumor size, N – metastases in lymphatic nodules, M – distant metastases
